# Supplementary material
Source: publisher site journal article supplement (https://www.dovepress.com/article/443835)
Supplement: Supplementary file 1 [file get_supplementary_file.php]

Supporting Information

ORIGINAL RESEARCH

Jinyuan Ma et al

**Dissolving Microneedle-Based Cascade-activation Nanoplatform for Enhanced Photodynamic Therapy of Skin Cancer**

Jinyuan Ma1,2*, Zongguang Tai1,2*, Ying Li1,2*, Yang Li3, Jiandong Wang1,2, Tao Zhou1,2, Min Shen1,2, Rujuan Xin1,2, Cuie Shen1,2, Quangang Zhu1,2#, Zhongjian Chen1,2#

1Shanghai Skin Disease Hospital, School of Medicine, Tongji University, Shanghai, China

2Shanghai Engineering Research Center for Topical Chinese Medicine, Shanghai, China

3CAS Key Laboratory of Design and Assembly of Functional Nanostructures, Fujian Institute of Research on the Structure of Matter, Chinese Academy of Sciences, Fuzhou, China

# These authors contributed equally.

Jinyuan Ma1,2*
Zongguang Tai1,2*
Ying Li1,2*
*These authors contributed equally to this work

Correspondence: Quangang Zhu

Shanghai Skin Disease Hospital, School of Medicine, Tongji University, 1278 Baode Road, Shanghai 200443, China

Tel +86 21 36803155

Fax +86 21 36803155

Email qgzhu@126.com

Correspondence: Zhongjian Chen

Shanghai Skin Disease Hospital, School of Medicine, Tongji University, 1278 Baode Road, Shanghai 200443, China

Tel +86 21 36803007

Fax +86 21 36803007

Email aajian818@163.com

**
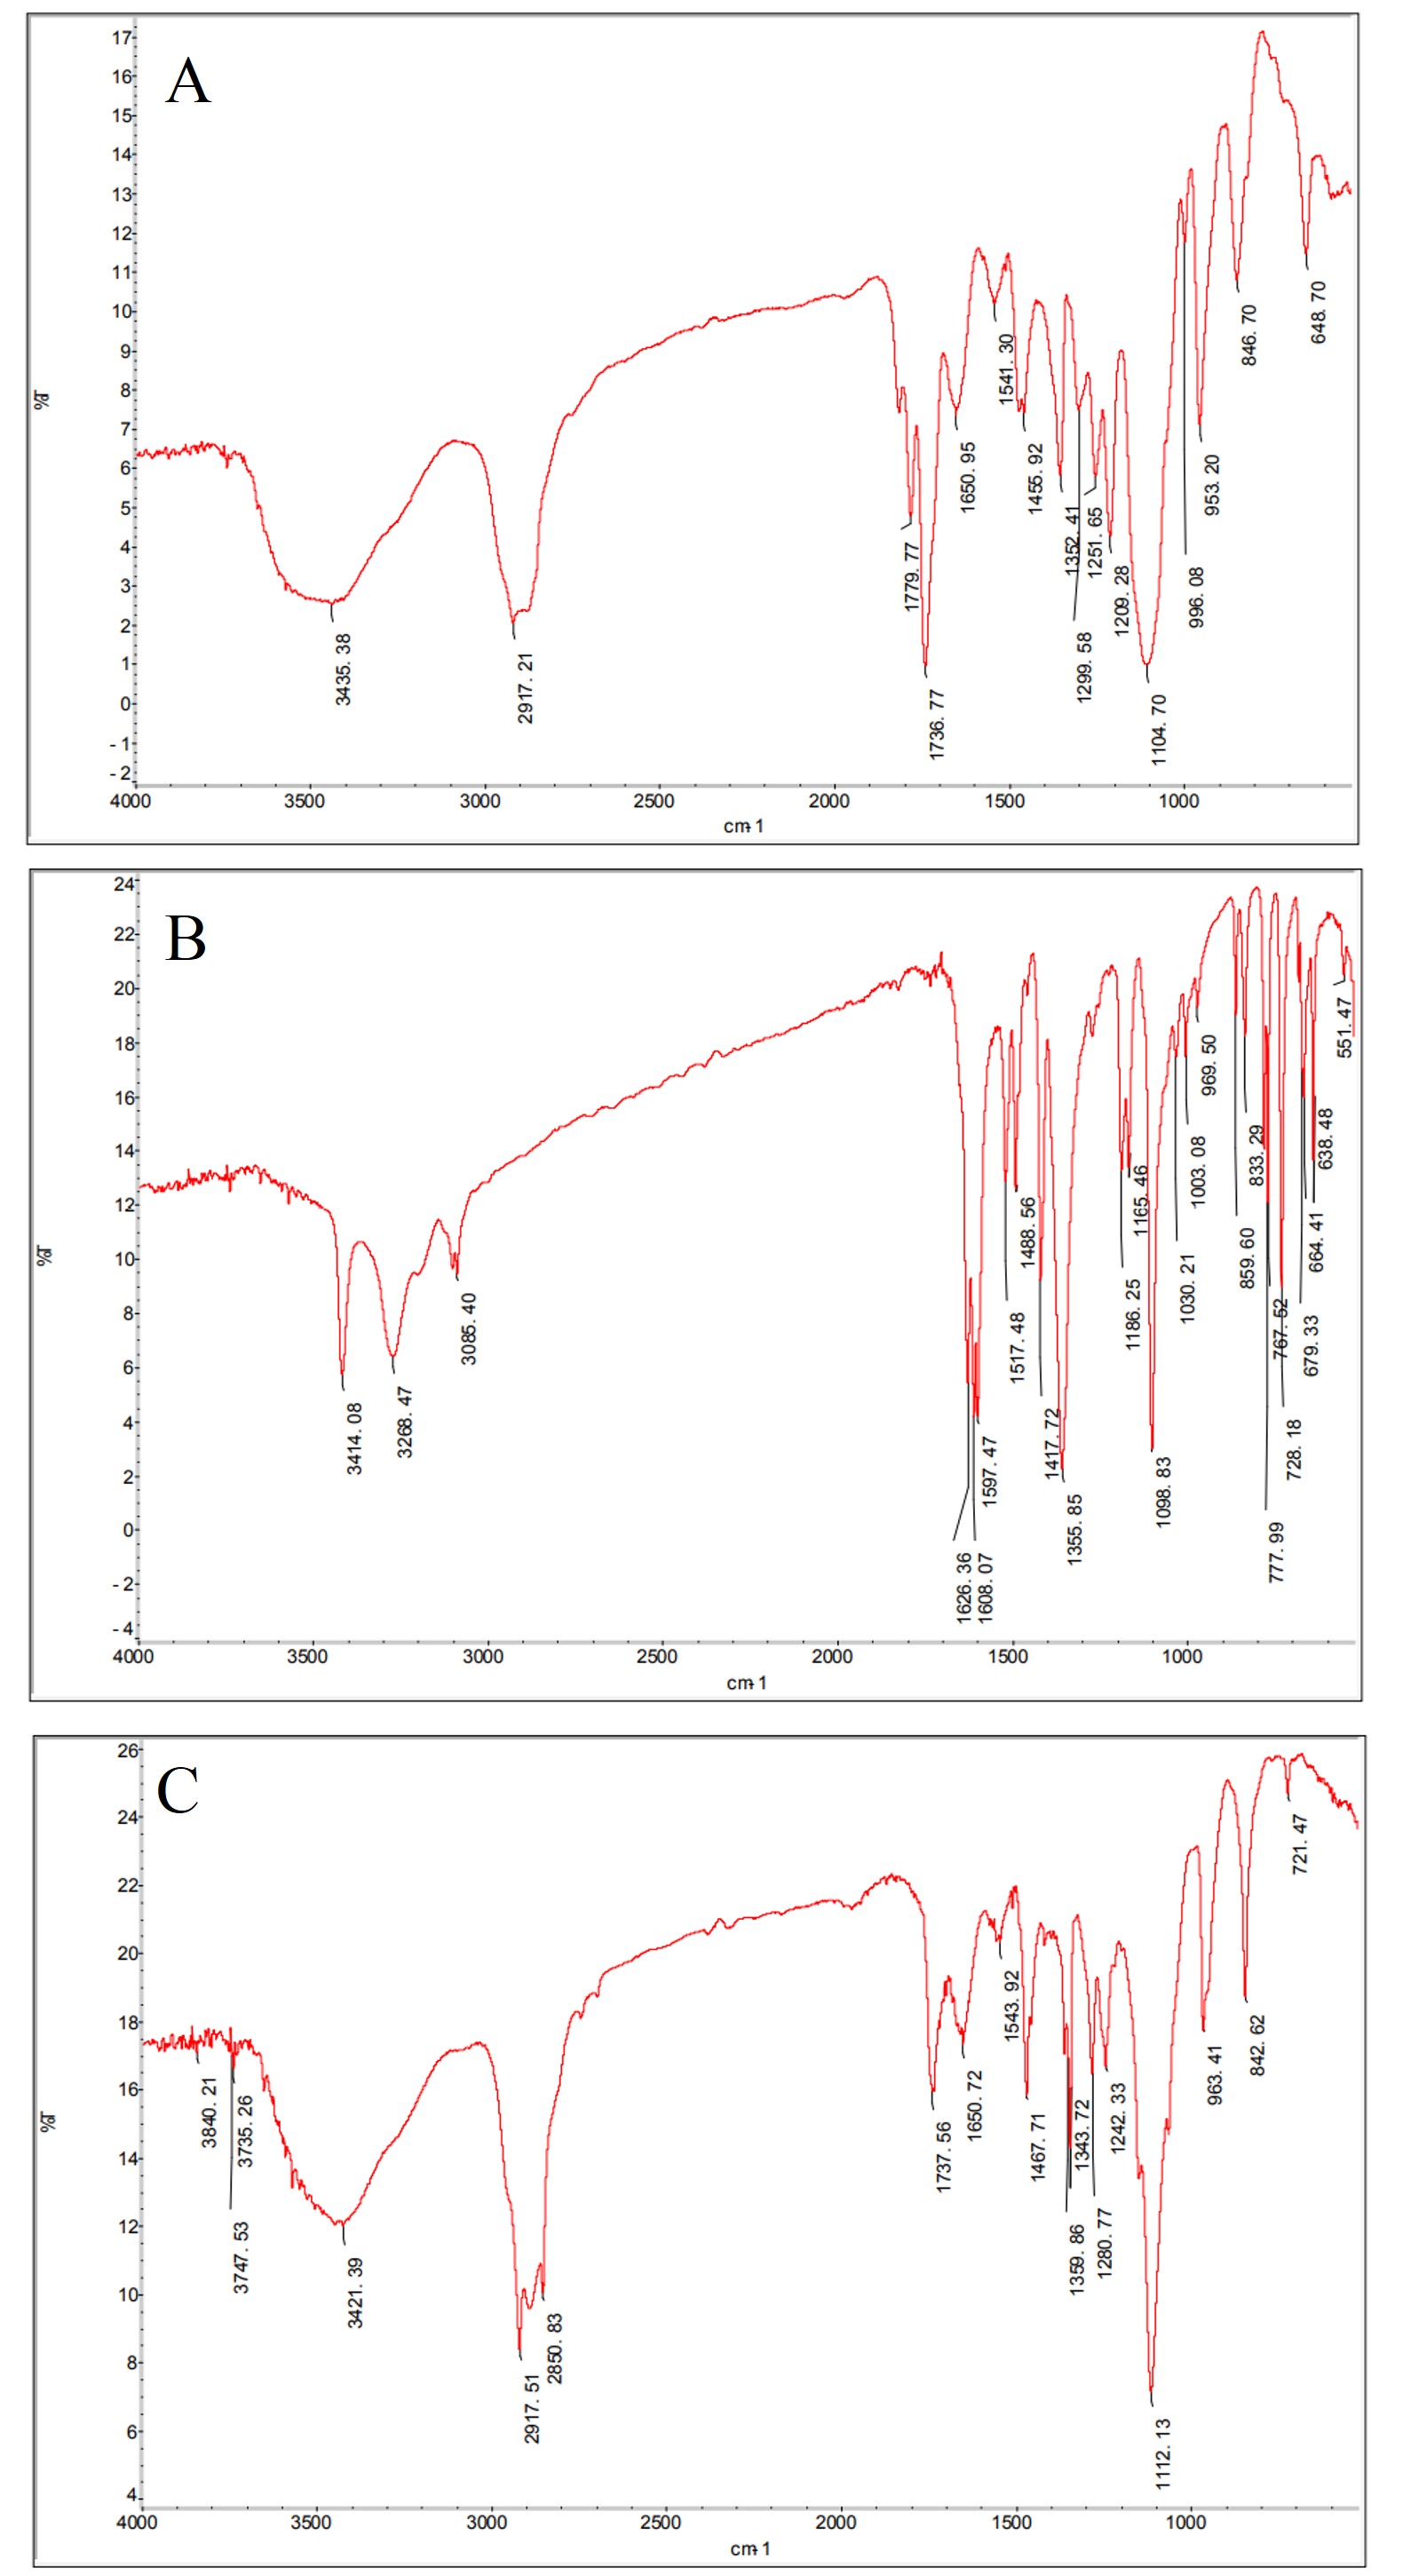
**

**Figure S1** The FT-IR spectrum of (A) DSPE-PEG-NHS, (B) TPZ, and (C) DSPE-PEG-TPZ.

**
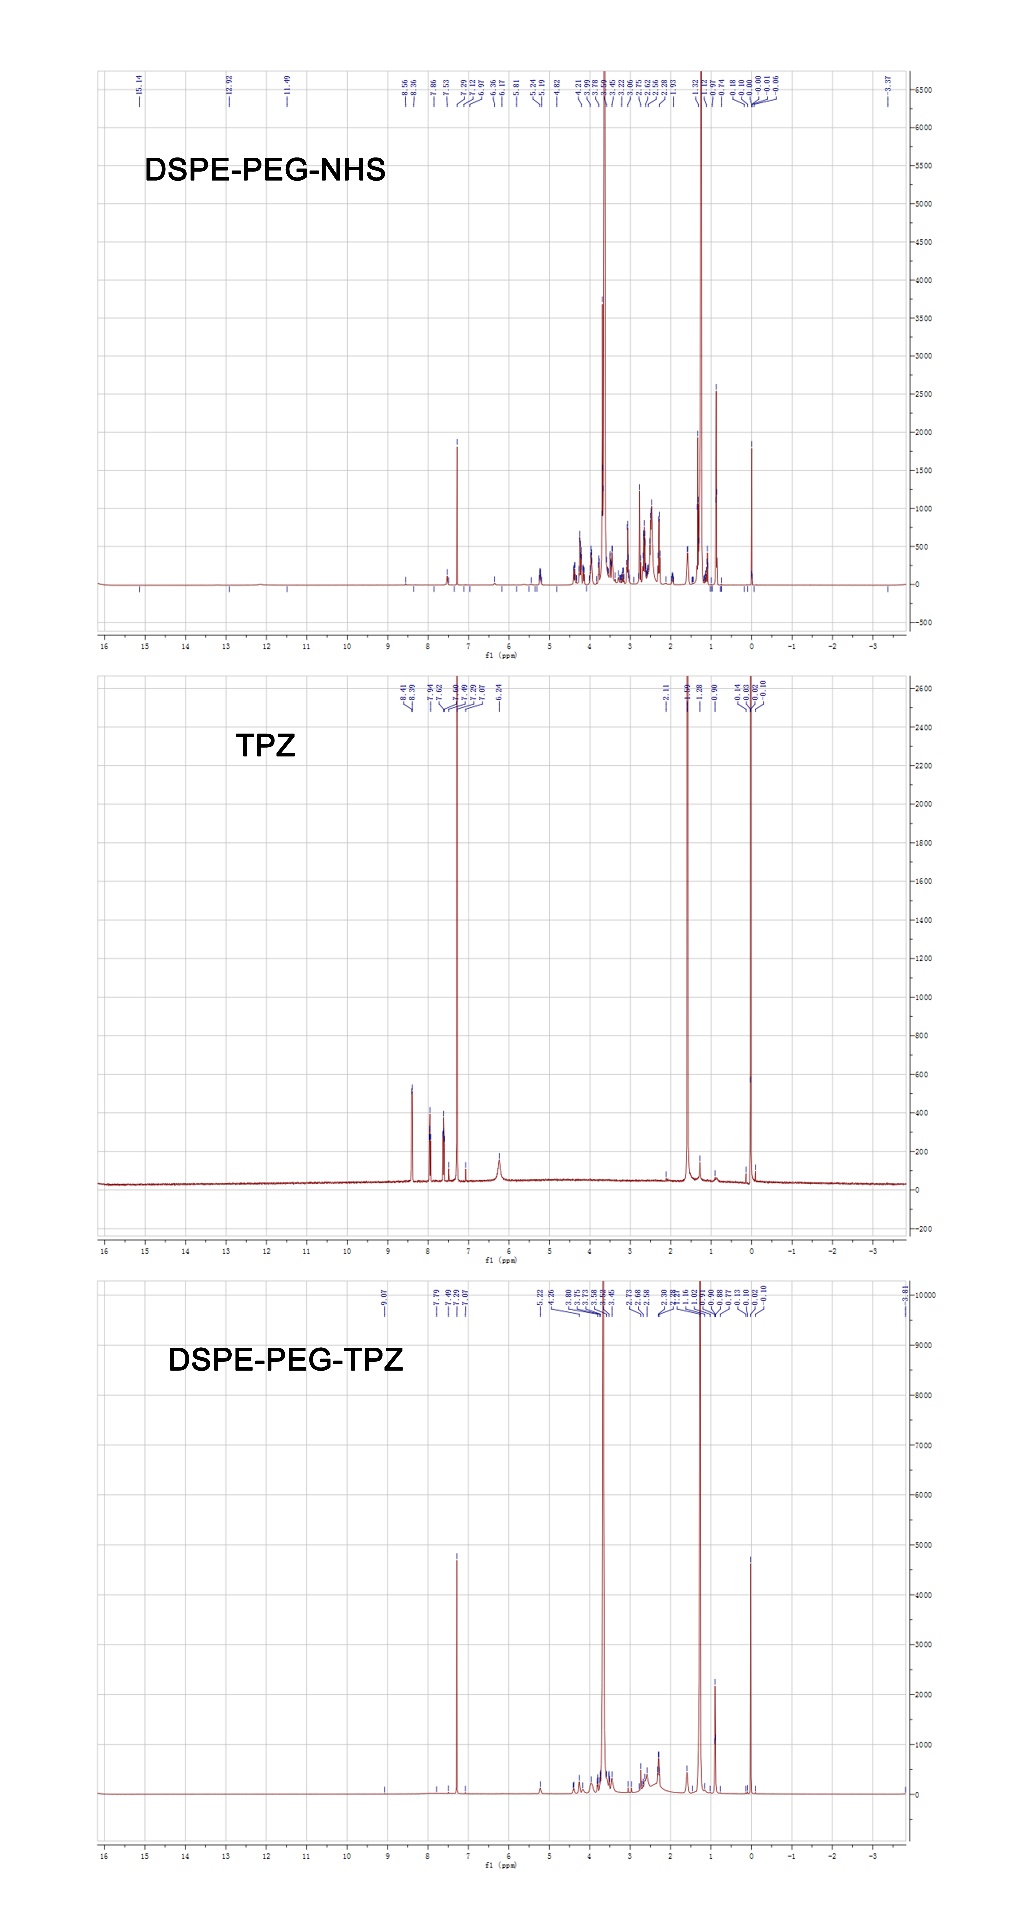
**

**Figure S2** The 1H-NMR spectra spectrum of DSPE-PEG-NHS, TPZ, and DSPE-PEG-TPZ.


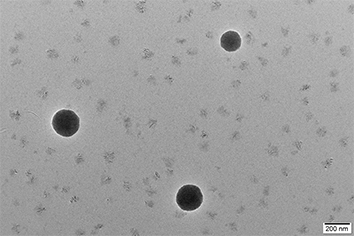


**Figure S3** Transmission electron microscopy images of DPC.


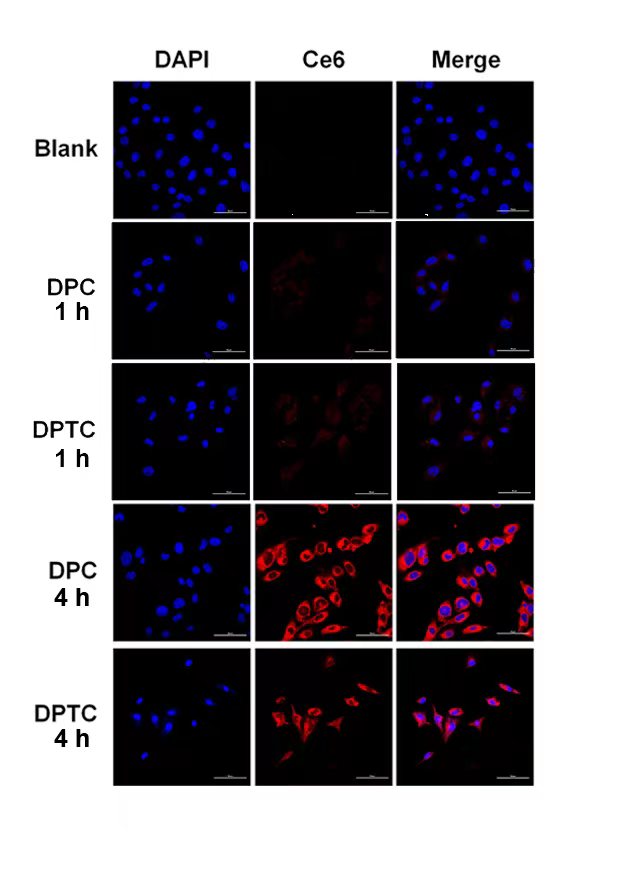


**Figure S4** CLSM images of B16 cells treated with DPTC for 1 h and 4 h (×600). Scale bar = 50 μm


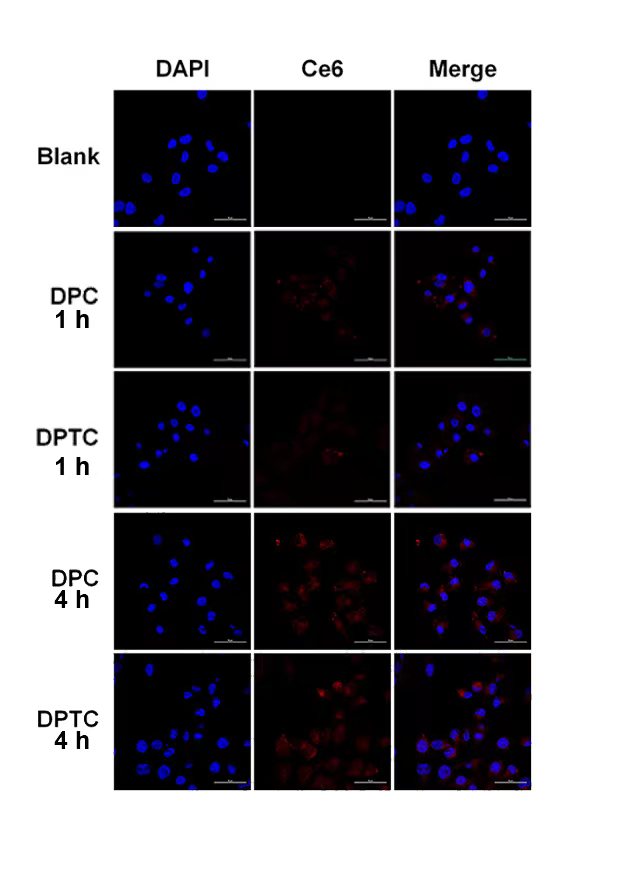


**Figure S5** CLSM images of SCL-1 cells treated with DPTC for 1 h and 4 h (×600). Scale bar = 50 μm


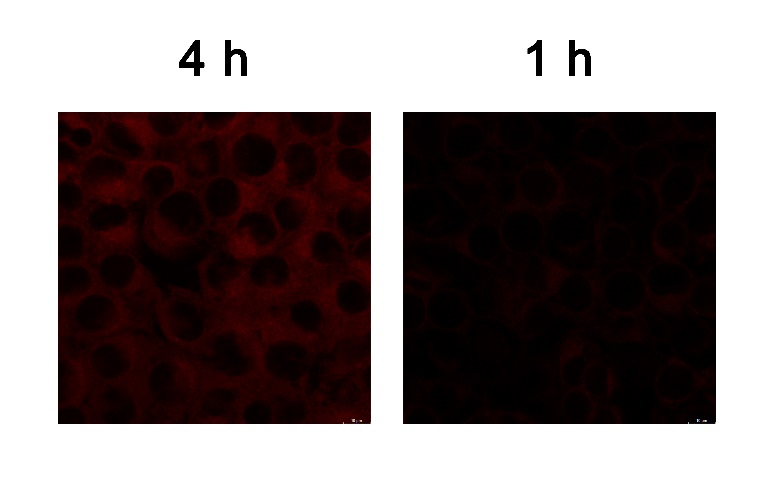


**Figure S6** CLSM images of B16 cells treated with Ce6 for 1 h and 4 h (×1000). Scale bar = 10 μm

**
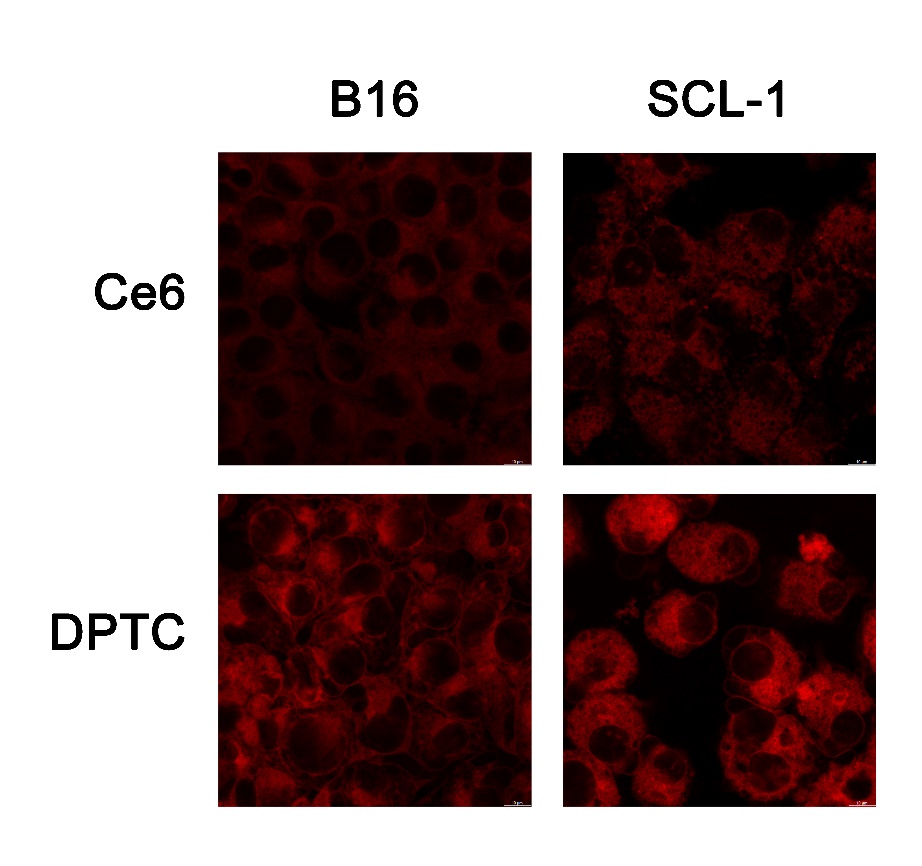
**

**Figure S7** CLSM images of B16 cells treated with DPTC or Ce6 for 4 h (×1000). Scale bar = 10 μm

**
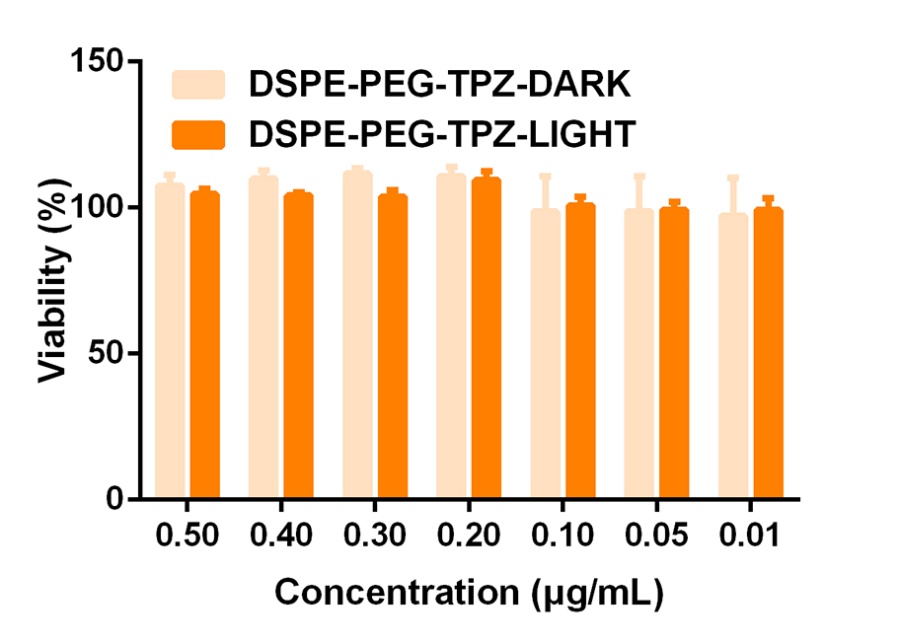
**

**Figure S8** In vitro cytotoxicity of DSPE-PEG-TPZ on B16 cells.


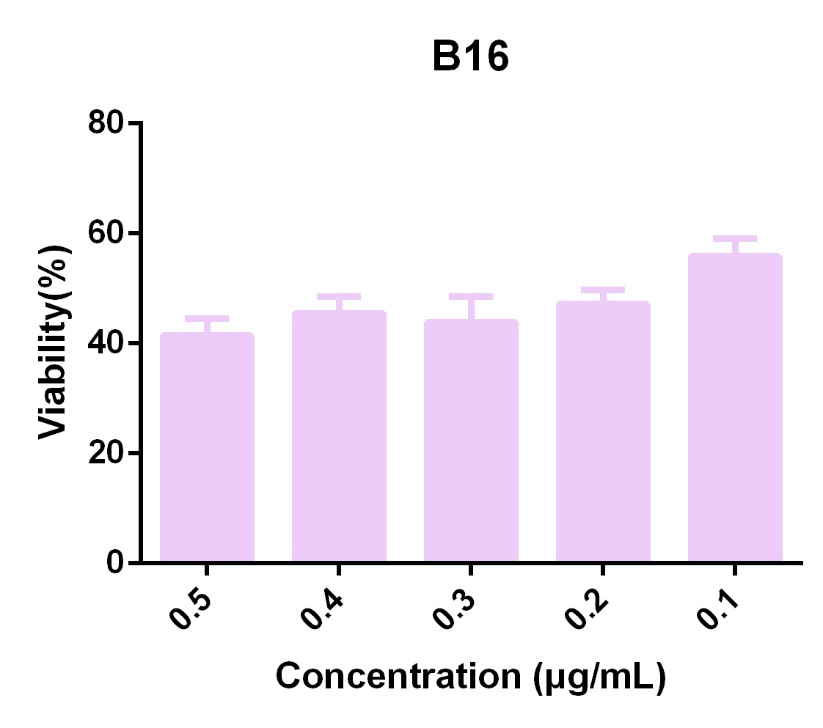


**Figure S9** In vitro cytotoxicity of DSPE-PEG-TPZon B16 cells in hypoxia condition.


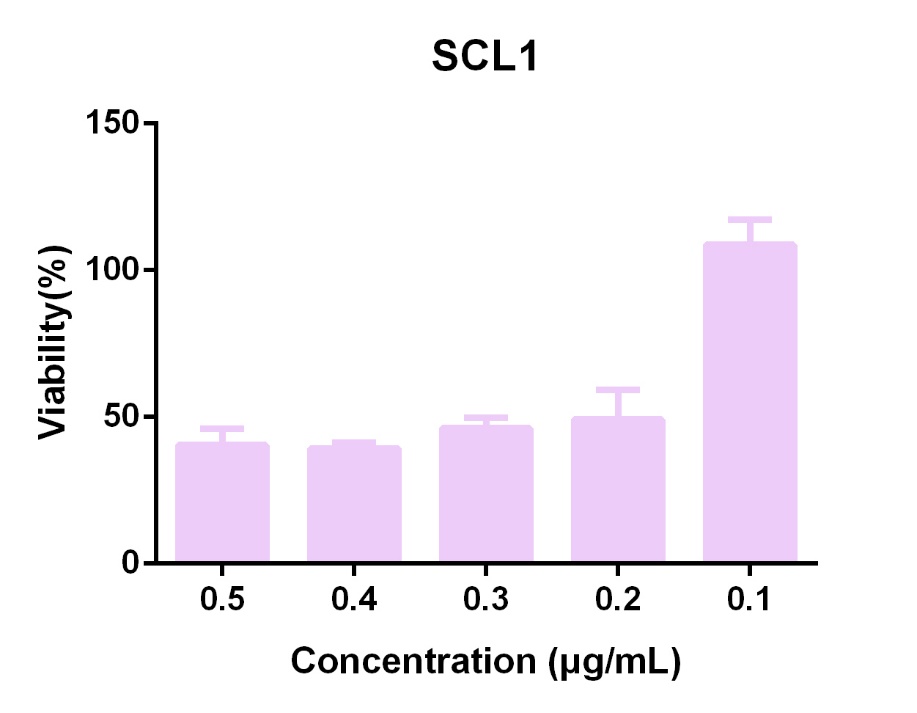


**Figure S10** In vitro cytotoxicity of DSPE-PEG-TPZ on SCL-1 cells in hypoxia condition.


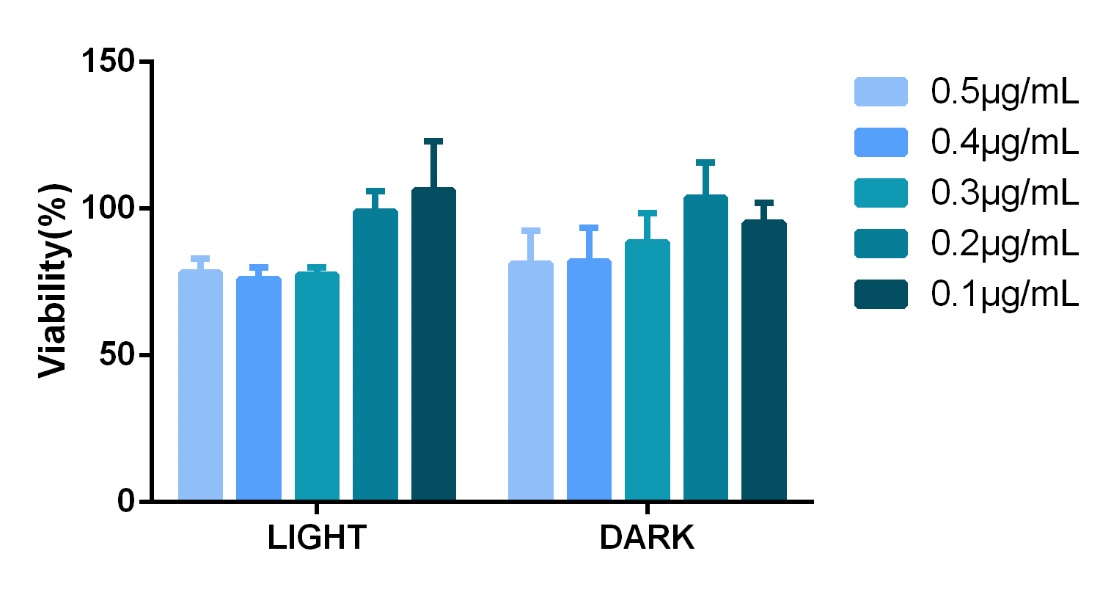


**Figure S11** In vitro cytotoxicity of free Ce6 on B16 cells.

**
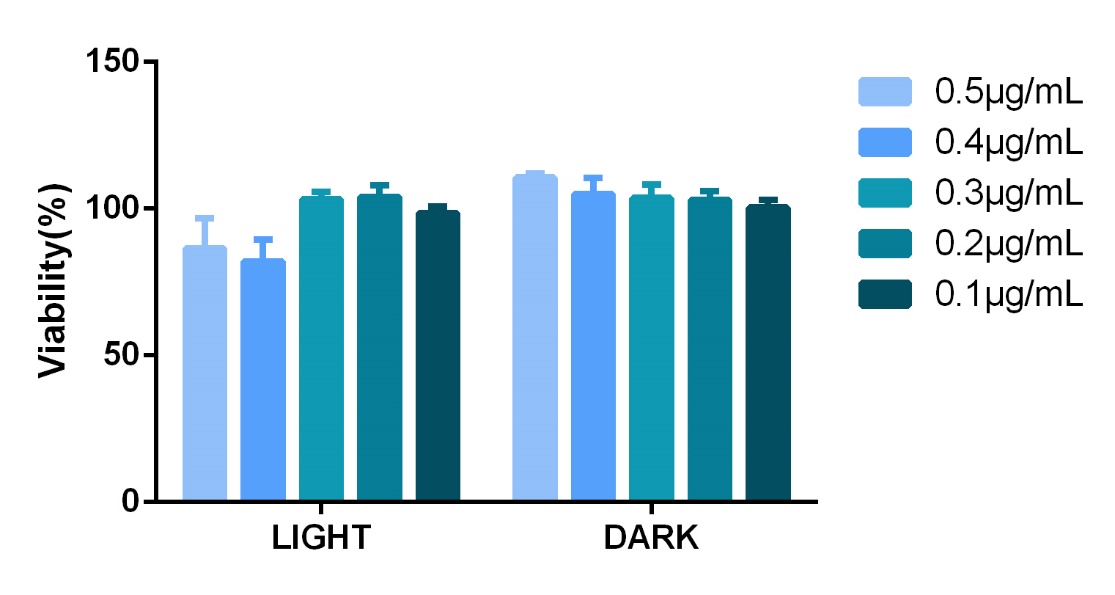
**

**Figure S12** In vitro cytotoxicity of free Ce6 on SCL-1 cells.


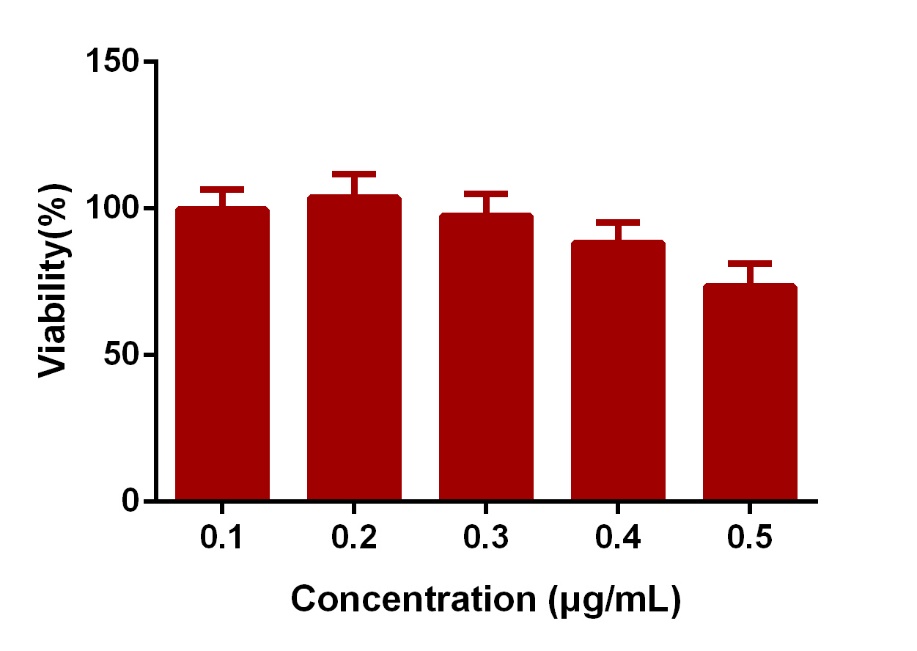


**Figure S13** In vitro cytotoxicity of DPTC at dark on HaCat cells.


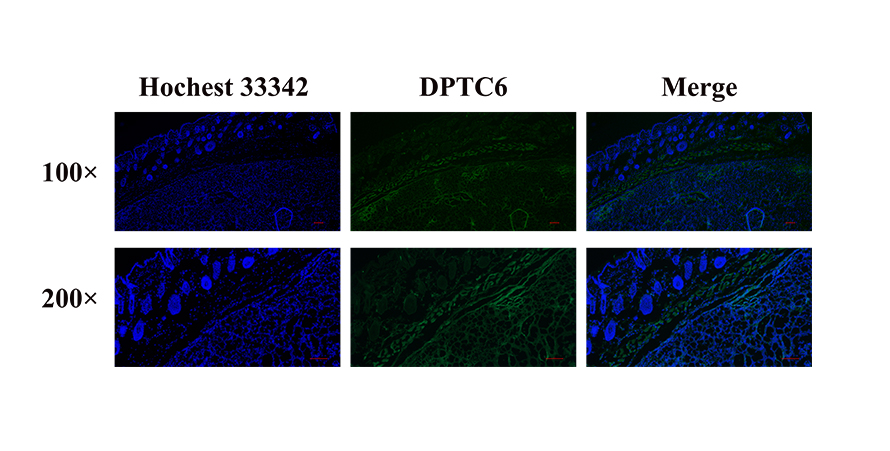


**Figure S14** DTPC6 fluorescence signals distribution on SCL-1 xenograft tumors when injected in vein.

**
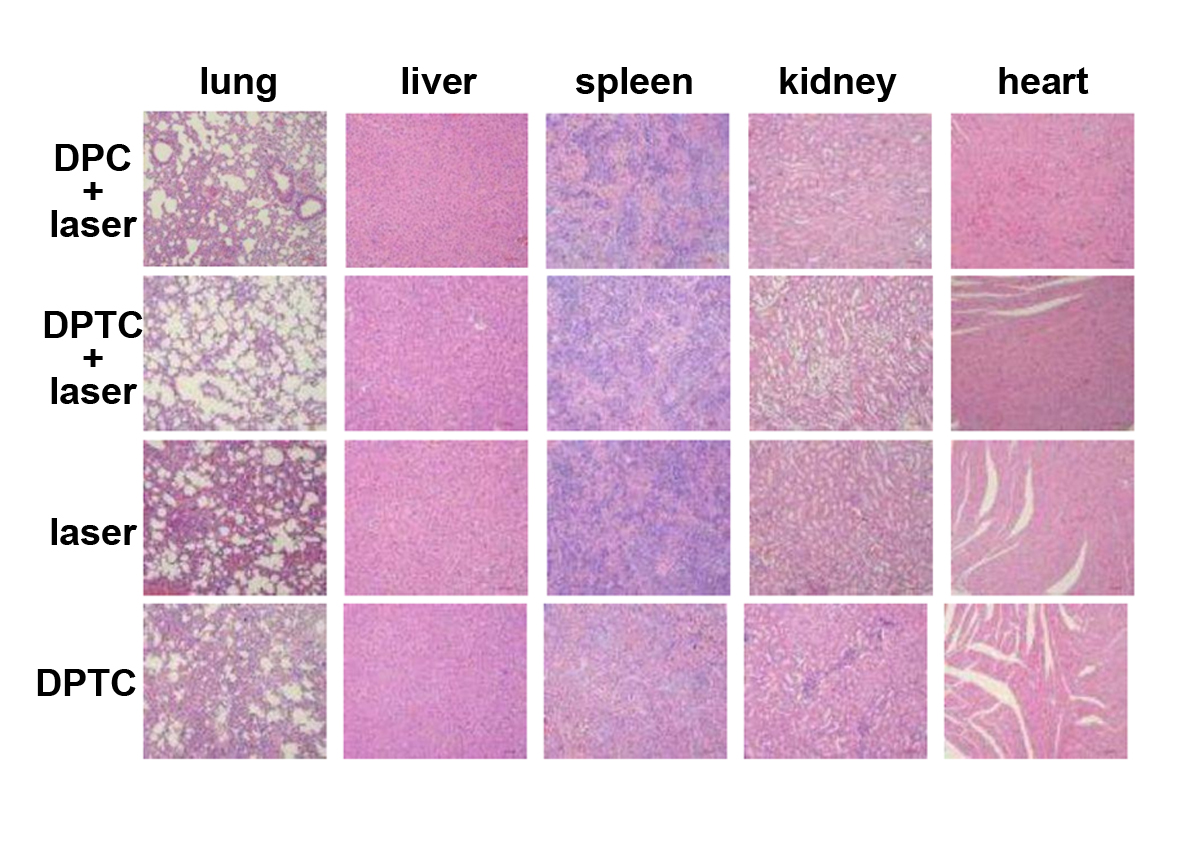
**

**Figure S15** H&E staining images of major organs (heart, liver, spleen, lung, and kidney) slides from different groups after 14-day treatment.
